# Supplementary material for: Transcriptional Response of Musca domestica Larvae to Bacterial Infection
Source: PubMed Central journal article supplement (PMC4138075; doi:10.1371/journal.pone.0104867), 2014-08-19

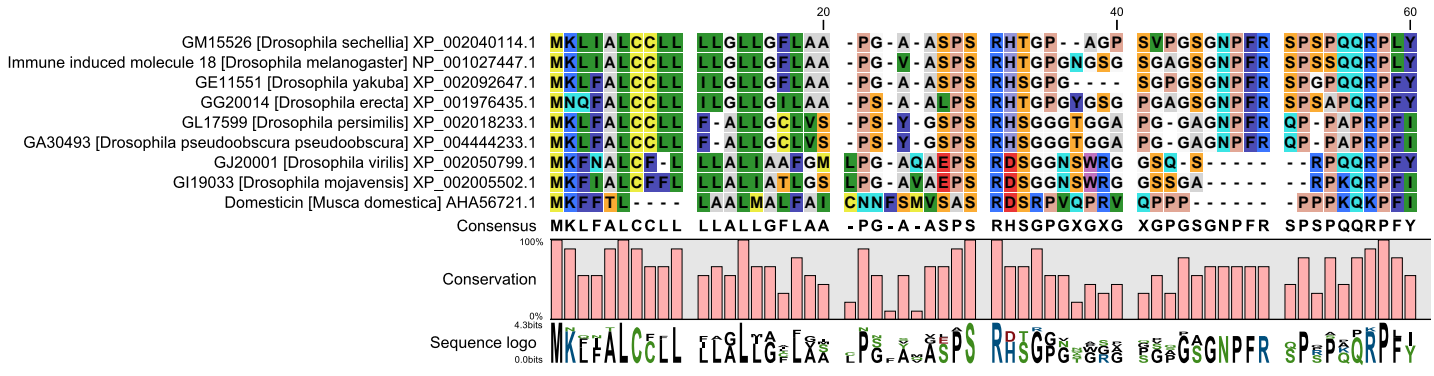

GM15526 [Drosophila sechellia] XP\_002040114.1 **YDAPV****GKPS** - - **KTMYA** 69  
 Immune induced molecule 18 [Drosophila melanogaster] NP\_001027447.1 **YDAPV****GKPS** - - **KTMYA** 71  
 GE11551 [Drosophila yakuba] XP\_002092647.1 **YDAPV****GKPS** - - **KTMYA** 66  
 GG20014 [Drosophila erecta] XP\_001976435.1 **YDAPV****GQPS** - - **RTMYA** 71  
 GL17599 [Drosophila persimilis] XP\_002018233.1 **YDAPV****RRPGQ** **PKTMYA** 70  
 GA30493 [Drosophila pseudoobscura pseudoobscura] XP\_004444233.1 **YDAPN****RRPGQ** **PKTMYA** 70  
 GJ20001 [Drosophila virilis] XP\_002050799.1 **YDAPV****RRPGQ** **PKTMYA** 66  
 GI19033 [Drosophila mojavensis] XP\_002005502.1 **YDAPV****RQPGR** **PQTMYA** 68  
 Domesticin [Musca domestica] AHA56721.1 **YDAPV****RRPGG** **RKTMYA** 65

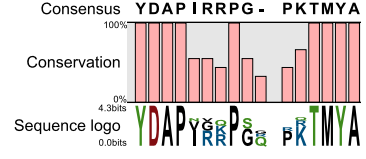

Supplement: pone.0104867.s004.pdf [file pone.0104867.s004.pdf]
